# Supplementary material for: Urinary Metabolic Phenotyping Reveals Differences in the Metabolic Status of Healthy and Inflammatory Bowel Disease (IBD) Children in Relation to Growth and Disease Activity
Source: PubMed Central journal article supplement (PMC5000707; doi:10.3390/ijms17081310), 2016-08-11
Supplement: ijms-17-01310-s001.pdf [file ijms-17-01310-s001.pdf]

# Supplementary Materials: Urinary Metabolic Phenotyping Reveals Differences in the Metabolic Status of Healthy and Inflammatory Bowel Disease (IBD) children in Relation to Growth and Disease Activity

Francois-Pierre Martin, Jessica Ezri, Ornella Cominetti, Laetitia Da Silva, Martin Kussmann, Jean-Philippe Godin and Andreas Nydegger

## 1. Supplementary Results

Variables identified by multivariate analysis were further probed by univariate testing as indicated in Table 2. When compared to healthy subjects, pediatric IBD patients show higher urinary excretion of phenylacetylglutamine (PAG), plus an unassigned metabolite giving resonance at  $^1\text{H}$  2.17 ppm (Uk3, Table 2); and lower urinary excretion of *cis*-aconitate, hippurate, and urea. Additional inspection of the UC subject spectra showed a consistently higher urinary excretion of acyl-carnitine, 4-hydroxyphenylacetate, tryptophan,  $\alpha$ -keto-beta-methyl-*N*-valerate, 2-oxoisocaproate, and lactate when compared to healthy subjects. By contrast, CD subjects showed a lower excretion of carnitine when compared to healthy subjects.

## 2. Supplementary Discussion

UC patients show a consistent trend towards higher levels of other gut microbial metabolites, 4-hydroxyphenylacetate and 4-hydroxyphenylpyruvate, that are mainly formed in the colon by bacterial fermentation [41,43], which may support region-specificity of gut metabolic dysbiosis.

Patients with UC have a consistent trend in higher urinary excretion of two products of branched chain amino acid (BCAA) metabolism, 3-methyl-2-oxovalerate and 2-oxoisocaproate, and lactate-end products of anaerobic carbohydrate metabolism, suggesting an upregulation of BCAA and carbohydrate catabolism. Concomitantly, urinary excretion of fatty acid  $\beta$ -oxidation intermediates, carnitine and acylcarnitine tends to decrease, thus indicating a downregulation of fatty acid breakdown through  $\beta$ -oxidation. Taken together with changes in PAG and the Krebs cycle, this urinary pattern describes a further remodeling of energy, amino acid and fatty acid metabolism in relation to the altered metabolic requirements of UC pediatric patients.

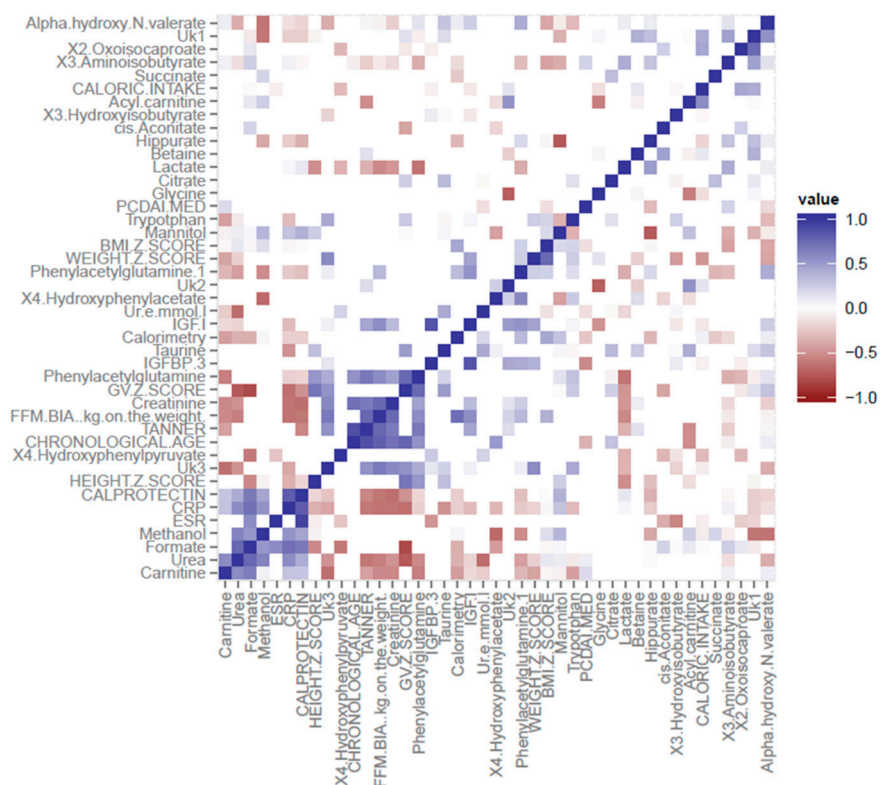

**Figure S1.** Correlation analysis between clinical and urine metabolome in CD children. Spearman correlation coefficient values shown are only those which are significant (after controlling for false discovery rate at a significance threshold of  $\alpha = 0.01$ ). Blue represents a perfect correlation of 1, while red indicates a perfect anti-correlation, of -1.

**Table S1.** Therapeutic management of IBD patients.

| Subject | Visit | Disease | Treatment |       |                     |             |     |         |
|---------|-------|---------|-----------|-------|---------------------|-------------|-----|---------|
|         |       |         | Steroids  | 5-ASA | Immunosuppressesurs | Biologicals | IPP | Calcium |
| 2A-1    | T0    | CD      |           |       |                     | Yes         | Yes | Yes     |
| 2A-1    | T6    | CD      |           |       |                     | Yes         | Yes | Yes     |
| 2A-1    | T12   | CD      |           |       |                     | Yes         | Yes | Yes     |
| 2A-10   | T0    | CD      |           |       |                     | Yes         |     | Yes     |
| 2A-10   | T6    | CD      |           |       |                     | Yes         |     | Yes     |
| 2A-10   | T12   | CD      |           |       |                     | Yes         |     | Yes     |
| 2A-11   | T0    | CD      |           |       | Yes                 |             |     |         |
| 2A-11   | T6    | CD      |           |       | Yes                 |             |     |         |
| 2A-11   | T12   | CD      |           |       | Yes                 |             |     |         |
| 2A-12   | T0    | UC      |           | Yes   |                     |             |     |         |
| 2A-12   | T6    | UC      |           | Yes   |                     |             |     |         |
| 2A-12   | T12   | UC      |           | Yes   |                     |             |     |         |
| 2A-13   | T0    | UC      |           | Yes   | Yes                 | Yes         |     | Yes     |
| 2A-13   | T6    | UC      |           | Yes   | Yes                 | Yes         |     | Yes     |
| 2A-13   | T12   | UC      |           | Yes   | Yes                 | Yes         |     | Yes     |
| 2A-14   | T0    | CD      |           | Yes   |                     | Yes         |     | Yes     |
| 2A-14   | T6    | CD      |           | Yes   |                     | Yes         |     | Yes     |
| 2A-14   | T12   | CD      |           | Yes   |                     | Yes         |     | Yes     |
| 2A-15   | T0    | CD      |           |       | Yes                 |             |     |         |
| 2A-15   | T6    | CD      |           |       | Yes                 |             |     |         |
| 2A-15   | T12   | CD      |           |       | Yes                 |             |     |         |

Table S1. Cont.

| Subject | Visit | Disease | Treatment |       |                     |             |     |         |
|---------|-------|---------|-----------|-------|---------------------|-------------|-----|---------|
|         |       |         | Steroids  | 5-ASA | Immunosuppressesurs | Biologicals | IPP | Calcium |
| 2A-16   | T0    | CD      |           |       | Yes                 |             |     | Yes     |
| 2A-17   | T6    | UC      |           |       |                     | Yes         |     | Yes     |
| 2A-17   | T12   | UC      |           |       |                     | Yes         |     | Yes     |
| 2A-2    | T0    | CD      |           |       |                     | Yes         |     |         |
| 2A-2    | T6    | CD      |           |       |                     | Yes         |     |         |
| 2A-2    | T12   | CD      |           |       | Yes                 |             |     |         |
| 2A-3    | T0    | CD      |           |       | Yes                 |             |     |         |
| 2A-3    | T6    | CD      |           |       | Yes                 |             |     |         |
| 2A-3    | T12   | CD      |           |       | Yes                 |             |     |         |
| 2A-4    | T0    | CD      |           |       |                     | Yes         |     |         |
| 2A-4    | T6    | CD      |           |       |                     | Yes         |     |         |
| 2A-4    | T12   | CD      |           |       |                     | Yes         |     |         |
| 2A-5    | T0    | UC      |           |       |                     | Yes         |     |         |
| 2A-5    | T6    | UC      |           |       |                     | Yes         |     |         |
| 2A-5    | T12   | UC      |           |       |                     | Yes         |     |         |
| 2A-6    | T0    | CD      |           |       |                     | Yes         |     |         |
| 2A-6    | T6    | CD      |           |       |                     | Yes         |     |         |
| 2A-7    | T0    | CD      |           |       | Yes                 |             |     |         |
| 2A-7    | T6    | CD      |           |       | Yes                 |             |     |         |
| 2A-7    | T12   | CD      |           |       | Yes                 |             |     |         |
| 2A-8    | T0    | CD      |           |       | Yes                 |             |     |         |
| 2A-8    | T6    | CD      |           |       |                     | Yes         |     | Yes     |
| 2A-8    | T12   | CD      |           |       |                     | Yes         |     | Yes     |
| 2A-9    | T0    | UC      |           | Yes   |                     | Yes         |     |         |
| 2A-9    | T6    | UC      |           | Yes   |                     | Yes         |     |         |
| 2A-9    | T12   | UC      |           | Yes   |                     | Yes         |     |         |
| 2B-1    | T0    | CD      | Yes       |       |                     | Yes         |     | Yes     |
| 2B-1    | T6    | CD      |           |       |                     | Yes         |     | Yes     |
| 2B-1    | T12   | CD      |           |       | Yes                 | Yes         |     | Yes     |
| 2B-2    | T0    | CD      | Yes       |       | Yes                 |             | Yes | Yes     |
| 2B-2    | T6    | CD      |           |       |                     | Yes         |     |         |
| 2B-2    | T12   | CD      |           |       |                     | Yes         |     |         |
| 2B-3    | T0    | UC      |           | Yes   |                     | Yes         |     |         |
| 2B-3    | T6    | UC      |           | Yes   |                     | Yes         |     |         |
| 2B-3    | T12   | UC      |           | Yes   | Yes                 | Yes         |     |         |
| 2B-4    | T0    | CD      | Yes       | Yes   |                     |             | Yes | Yes     |
| 2B-4    | T6    | CD      |           |       | Yes                 |             |     |         |
